# Supplementary material
Source: MDPI journal article supplement (https://www.mdpi.com/2073-4344/8/10/437)
Supplement: s1 [file s1]

# Ammonia Plasma-Catalytic Synthesis using Low Melting Point Alloys

Javishk R. Shah <sup>1</sup>, Joshua M. Harrison<sup>1</sup> and Maria L. Carreon <sup>1,\*</sup>

<sup>1</sup> Russell School of Chemical Engineering, The University of Tulsa, 800 S Tucker Dr, Tulsa, OK – 74104, US.

\* Correspondence: maria-carreon@utulsa.edu; Tel.: +1-918-631-2424

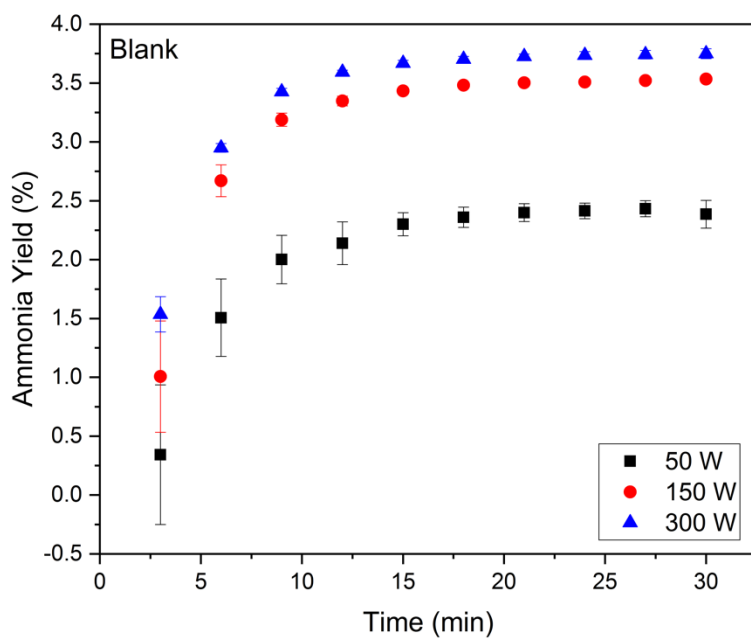

**Figure S1.** Ammonia Yield (%) vs. Time (min) for reactions run with no catalyst.

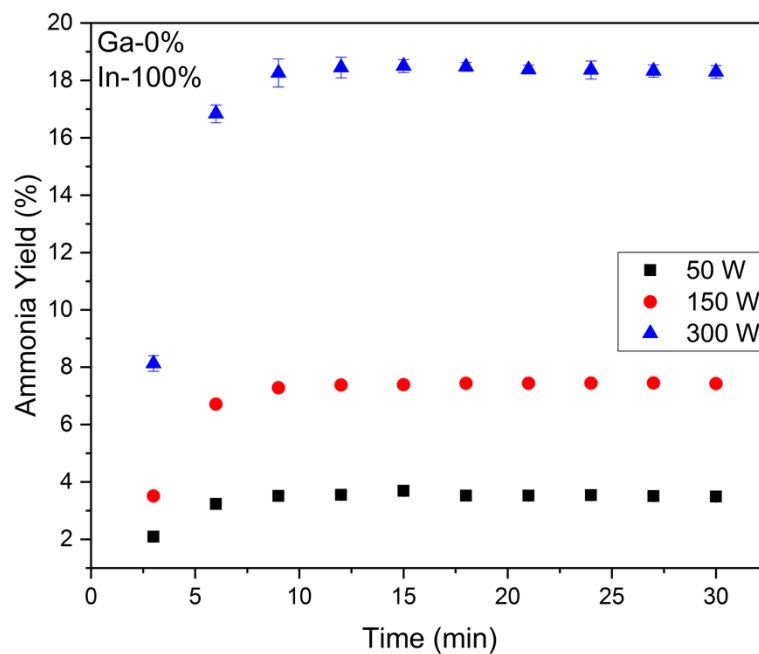

**Figure S2.** Ammonia Yield (%) vs. Time (min) for reactions with pure In as catalyst.

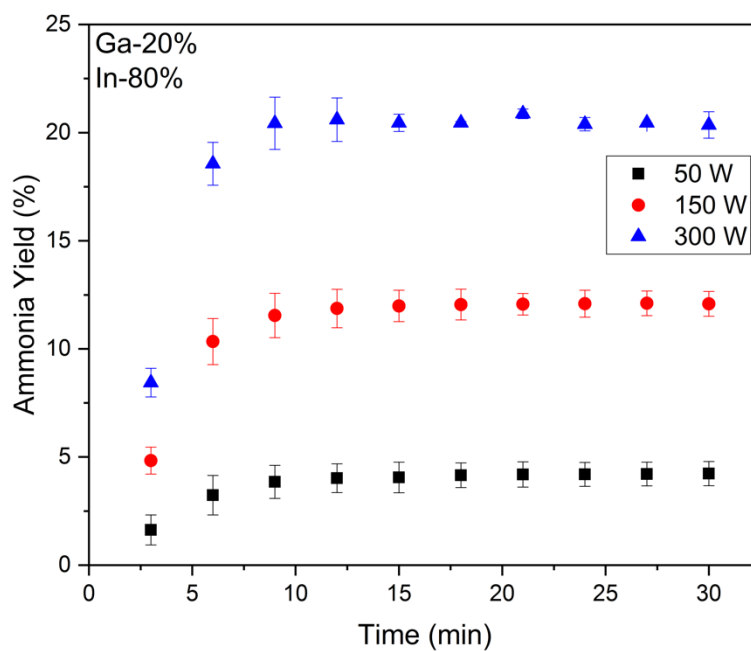

**Figure S3.** Ammonia Yield (%) vs. Time (min) for reactions run with Ga-In Alloy (20:80).

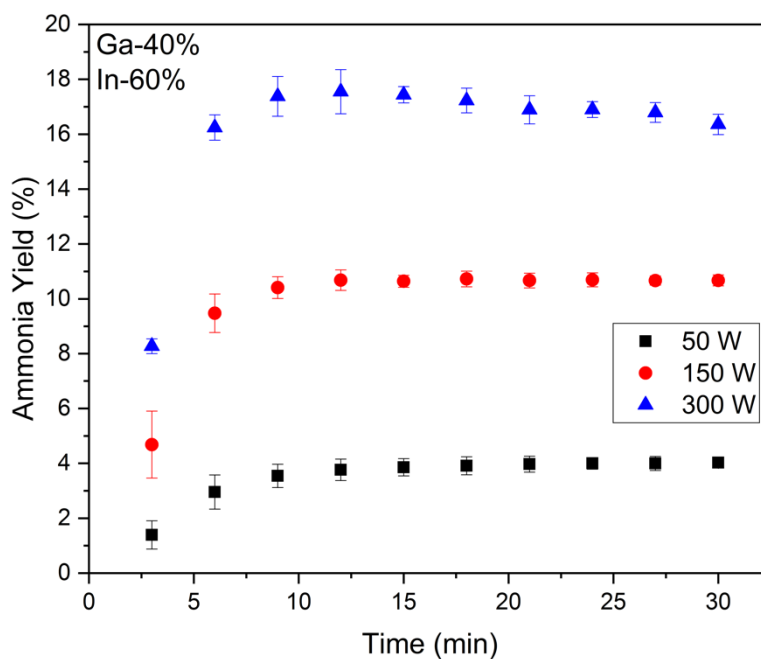

**Figure S4.** Ammonia Yield (%) vs. Time (min) for reactions run with Ga-In Alloy (40:60).

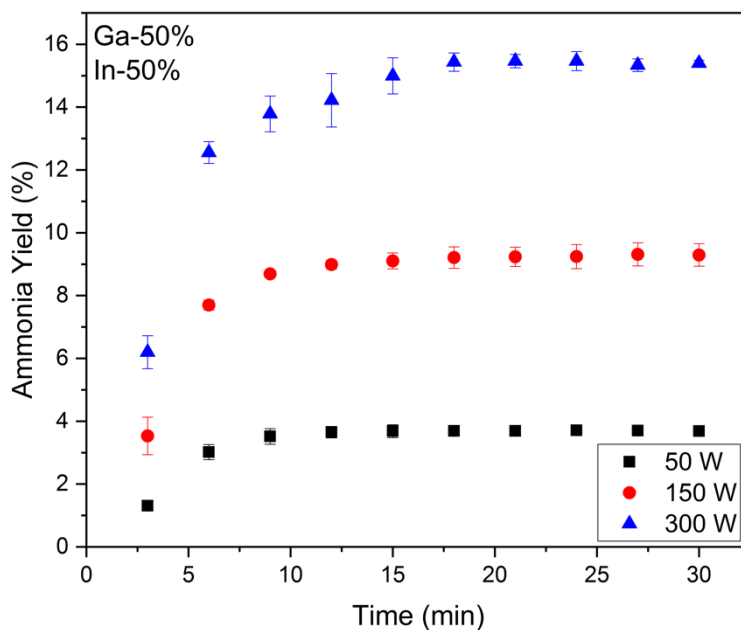

**Figure S5.** Ammonia Yield (%) vs. Time (min) for reactions run with Ga-In Alloy (50:50).

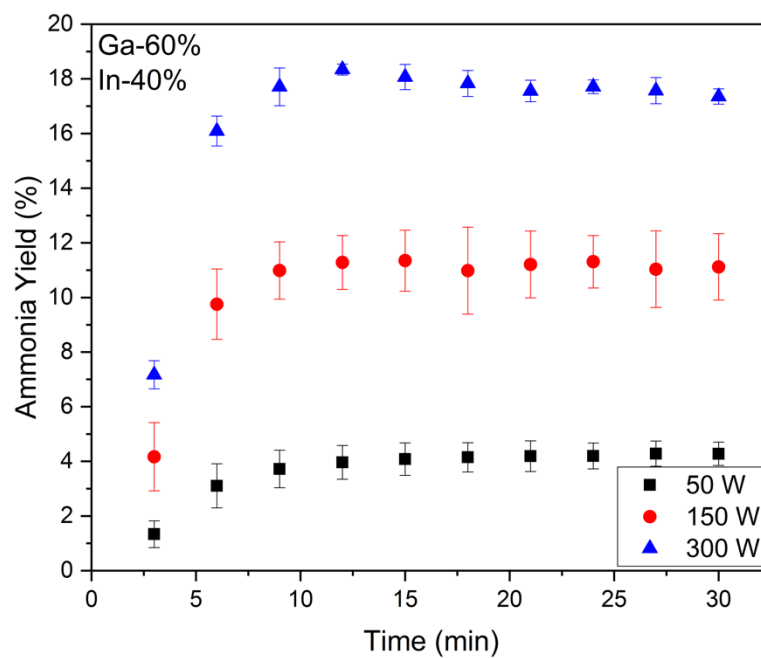

**Figure S6.** Ammonia Yield (%) vs. Time (min) for reactions run with Ga-In Alloy (60:40).

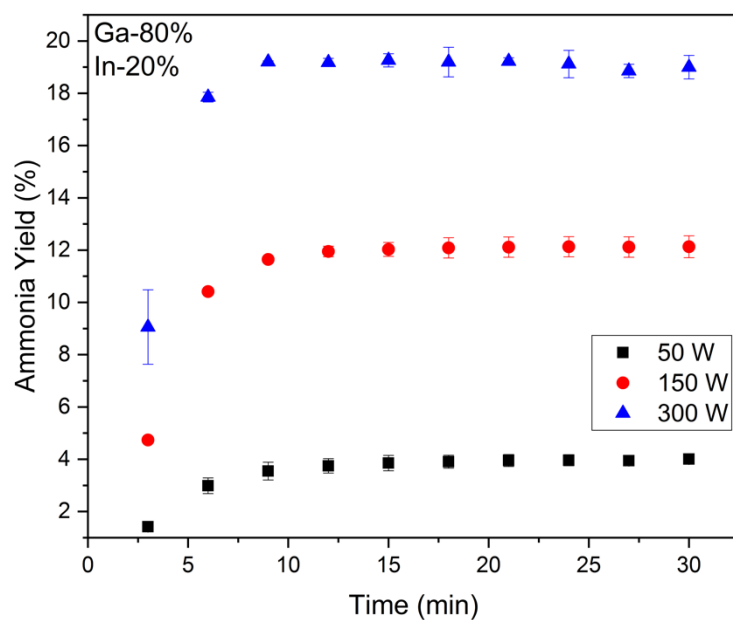

**Figure S7.** Ammonia Yield (%) vs. Time (min) for reactions run with Ga:In Alloy (80:20).

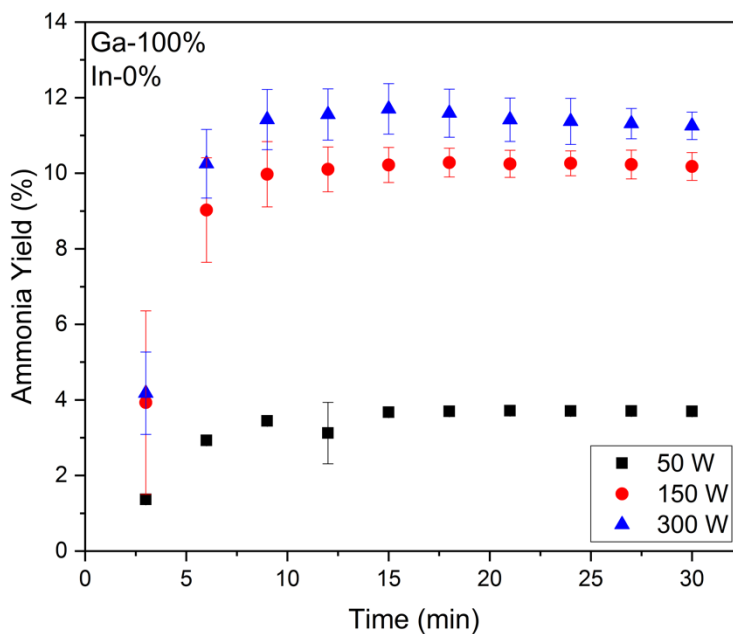

**Figure S8.** Ammonia Yield (%) vs. Time (min) for reactions run with pure Ga as catalyst.

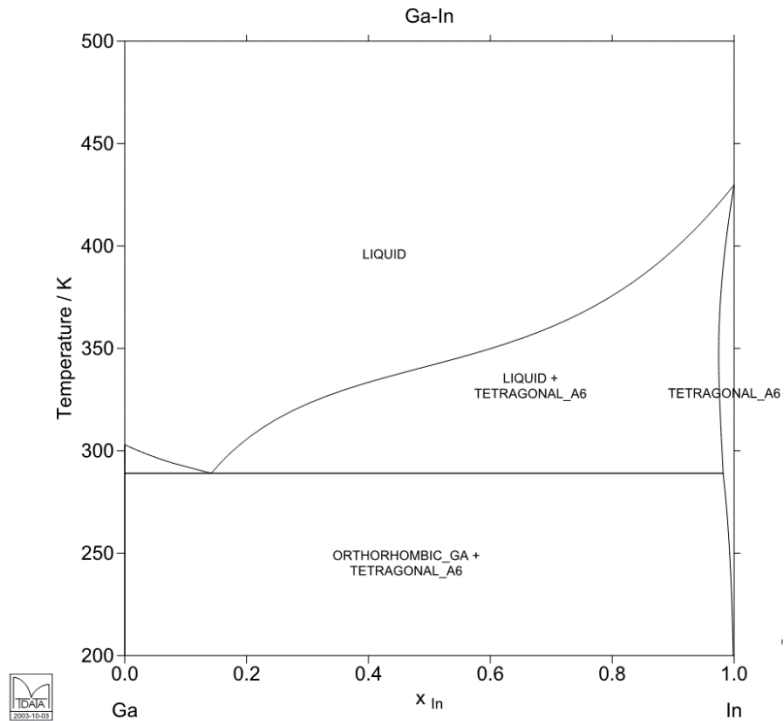

**Figure S9.** Ga-In Alloy Phase diagram.[1]

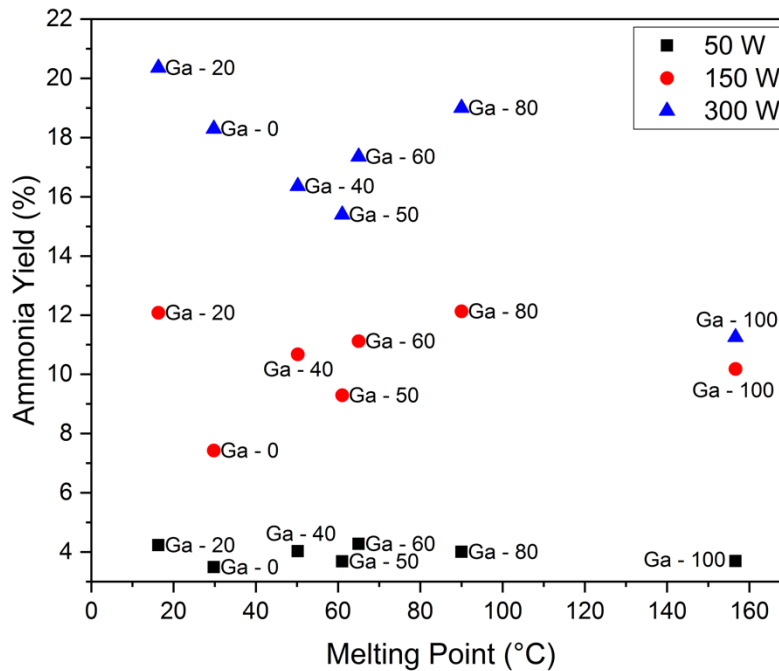

**Figure S10.** Ammonia Yield (%) vs. Alloy Melting Point (°C) for various plasma powers.

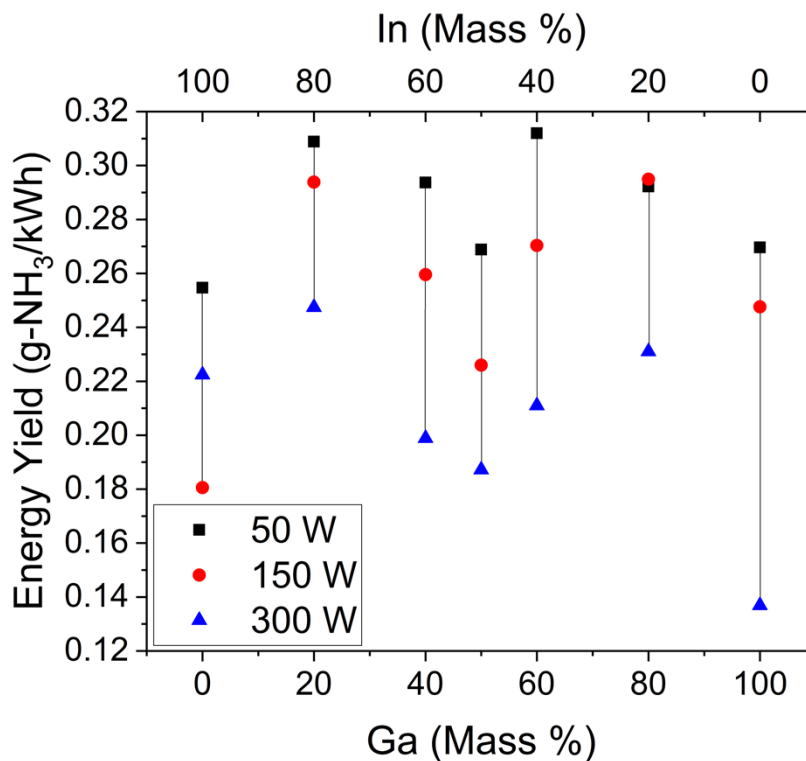

**Figure S11.** Energy Yield (g-NH<sub>3</sub>/kWh) vs. Composition of Alloy (mass%) for various plasma powers

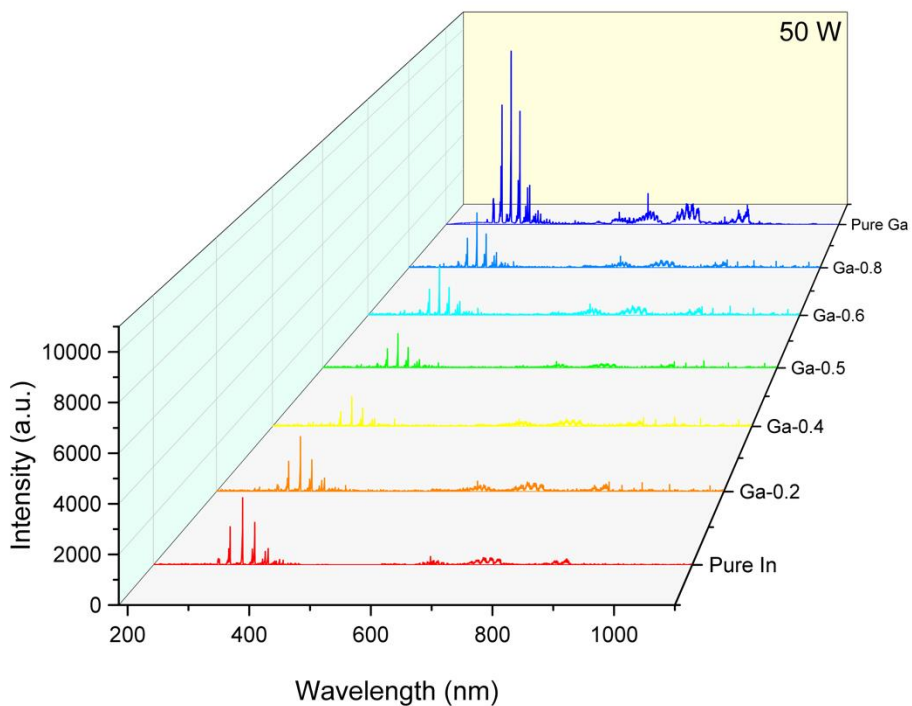

**Figure 12.** Emission spectra of plasma using various catalysts at 50 W plasma power

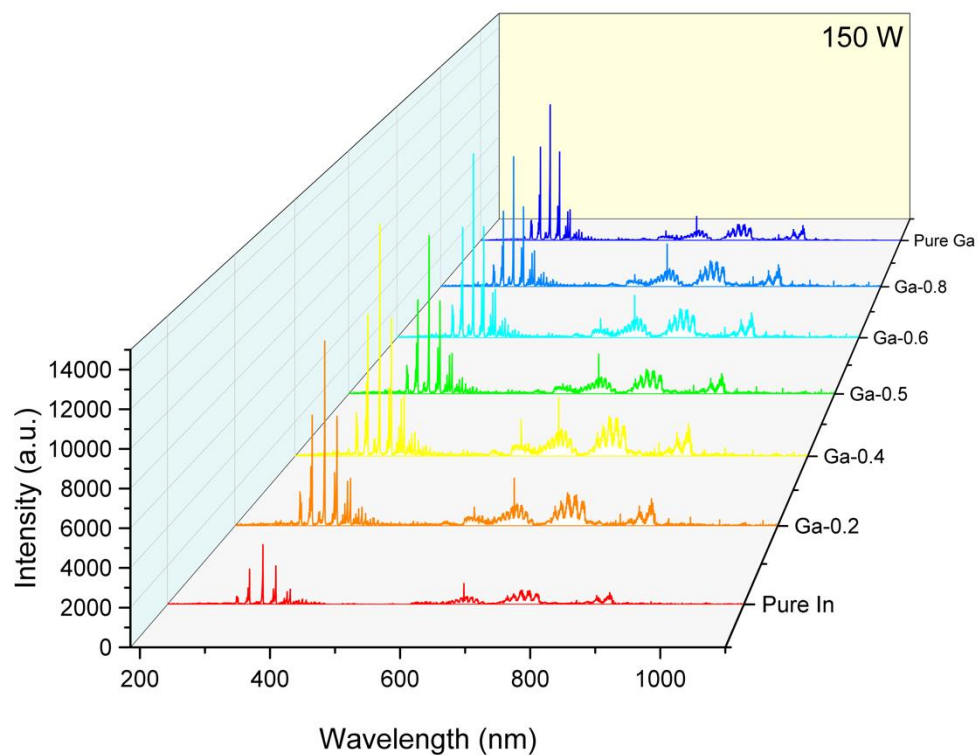

**Figure S13.** Emission spectra of plasma using various catalysts at 150 W plasma power

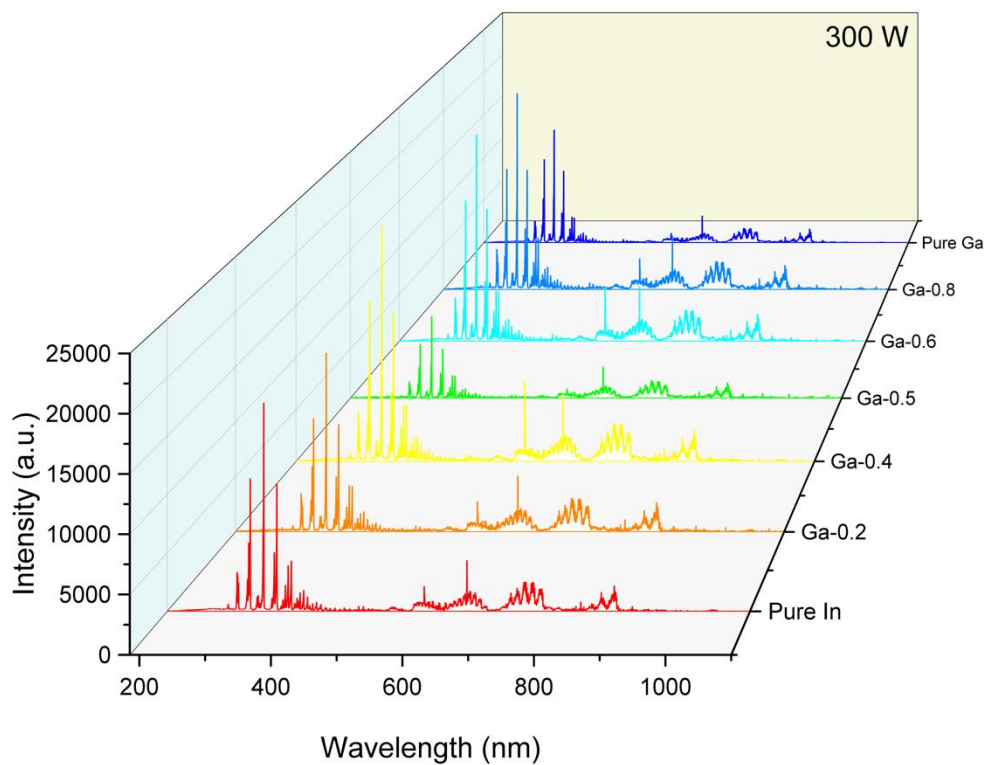

**Figure S14.** Emission spectra of plasma using various catalysts at 300 W plasma power



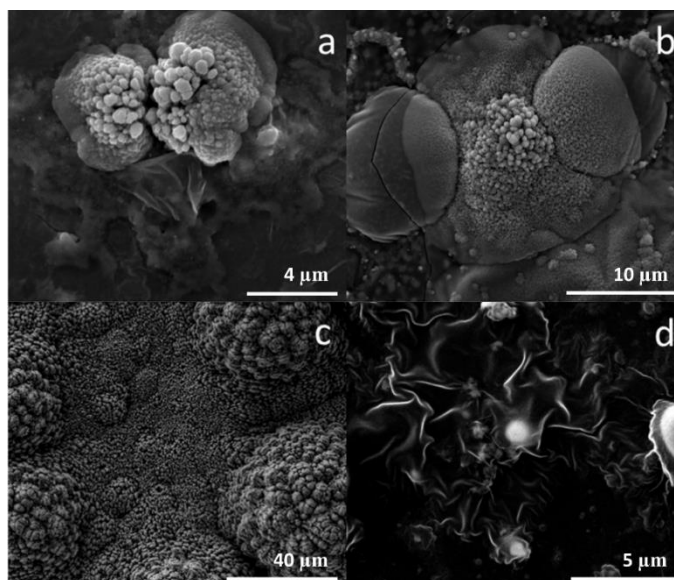

**Figure S15.** Formation of GaN (plasma treatment time) a) Starting of Nucleation Process (5 min) b) Dissolution of Nitrogen in the Gallium Droplet (15 min) c) Durain-like GaN Nanostructures (30 min) d) Nanowires of GaN getting generated from a single droplet (120 min)

## References

1. Calculated Ga-In phase diagram. Available online: <http://resource.npl.co.uk/mtdata/phdiagrams/gain.htm> (accessed on August, 2018).
